# Supplementary material for: COVID-19 Impacts on Beaches and Coastal Water Pollution at Selected Sites in Ecuador, and Management Proposals Post-pandemic
Source: Frontiers journal article supplement (doi:10.3389/fmars.2021.669374), 2021-07-01

## Supplementary Material

### **COVID-19 impacts on beaches and coastal water pollution at selected sites in Ecuador, and management proposals post-pandemic.**

Ormaza-González, Franklin I., Divar Castro-Rodas and P. J. Statham

**Table 1.** Questionnaire for Salinas, Manta and Galapagos. Scientific names were not requested as the public will not have this knowledge.

|            | <b>Questions Salinas and Manta</b>                                                                                                        |
|------------|-------------------------------------------------------------------------------------------------------------------------------------------|
| <b>Q1</b>  | Have beach and water quality visually changed? Yes or No                                                                                  |
| <b>Q2</b>  | What has changed about the sand/water? a) It is cleaner, b) There is less plastic and c) The water is more transparent.                   |
| <b>Q3</b>  | Is there less noise on the beach?                                                                                                         |
| <b>Q4</b>  | Is there more fish activity close to the beach?                                                                                           |
| <b>Q5</b>  | Which option do you think looks most recurring? a) Fish in general, b) Sharks, c) Manta-rays, d) Dolphins e) Whales, f) Others            |
| <b>Q6</b>  | Supposing a lot of people come suddenly, what do you think the impact would be?                                                           |
| <b>Q7</b>  | Do you agree that tourism must be reactivated in an orderly manner? Yes or No                                                             |
| <b>Q8</b>  | From 1 to 5. How do you rate the beaches of Manta before the quarantine?<br>Being: 1) worst 2) regular 3) acceptable 4) good 5) excellent |
| <b>Q9</b>  | From 1 to 5. How do you rate the beaches of Manta after quarantine?<br>Being: 1) worst 2) regular 3) acceptable 4) good 5) excellent      |
| <b>Q10</b> | Do you know if Manta has a wastewater treatment plant?                                                                                    |
| <b>Q11</b> | To which area of activity (work) do you feel identified?                                                                                  |
|            | <b>Questions Galapagos</b>                                                                                                                |
| <b>Q1</b>  | Have you observed more fauna such as sea lions on the beaches or the pier?<br>Yes or No                                                   |
| <b>Q2</b>  | If the answer is yes above on a scale of 1 to 5, how much more?                                                                           |
| <b>Q3</b>  | Have you seen less plastic or trash on the beaches? Yes or No                                                                             |
| <b>Q4</b>  | If the answer is yes above on a scale of 1 to 5, how much more?                                                                           |
| <b>Q5</b>  | Have you noticed improvement in water clarity? Yes or No                                                                                  |
| <b>Q6</b>  | Have you observed increased activity / presence of Sea Turtles? Yes or No                                                                 |
| <b>Q7</b>  | If the answer is yes above on a scale of 1 to 5, how much more?                                                                           |
| <b>Q8</b>  | Have you seen more shark activity near the beach?                                                                                         |
| <b>Q9</b>  | Does the presence of fewer boats, noise and traffic seem to have contributed to the return of wildlife to certain places? Yes or No       |
| <b>Q10</b> | Do you think that taking information and data such as water quality could improve future management of beaches and visits to them?        |
| <b>Q11</b> | To which area of activity (work) do you feel identified?                                                                                  |

**Photo 1.** Upper panel. Algae growth on a rock. Left. Just after the first pandemic restrictions were lifted (June 2020). Right. After few months restrictions to be on beaches were eased (Jan 2021). Lower panel. Station D beach. Left, just after second lockdowns restrictions were partially lifted (Sep/2020) Right. Few months after restrictions, early 2021. This beach is cleaned every week by Ormaza-González and Vera-Mosquera (2021) since June 2019.

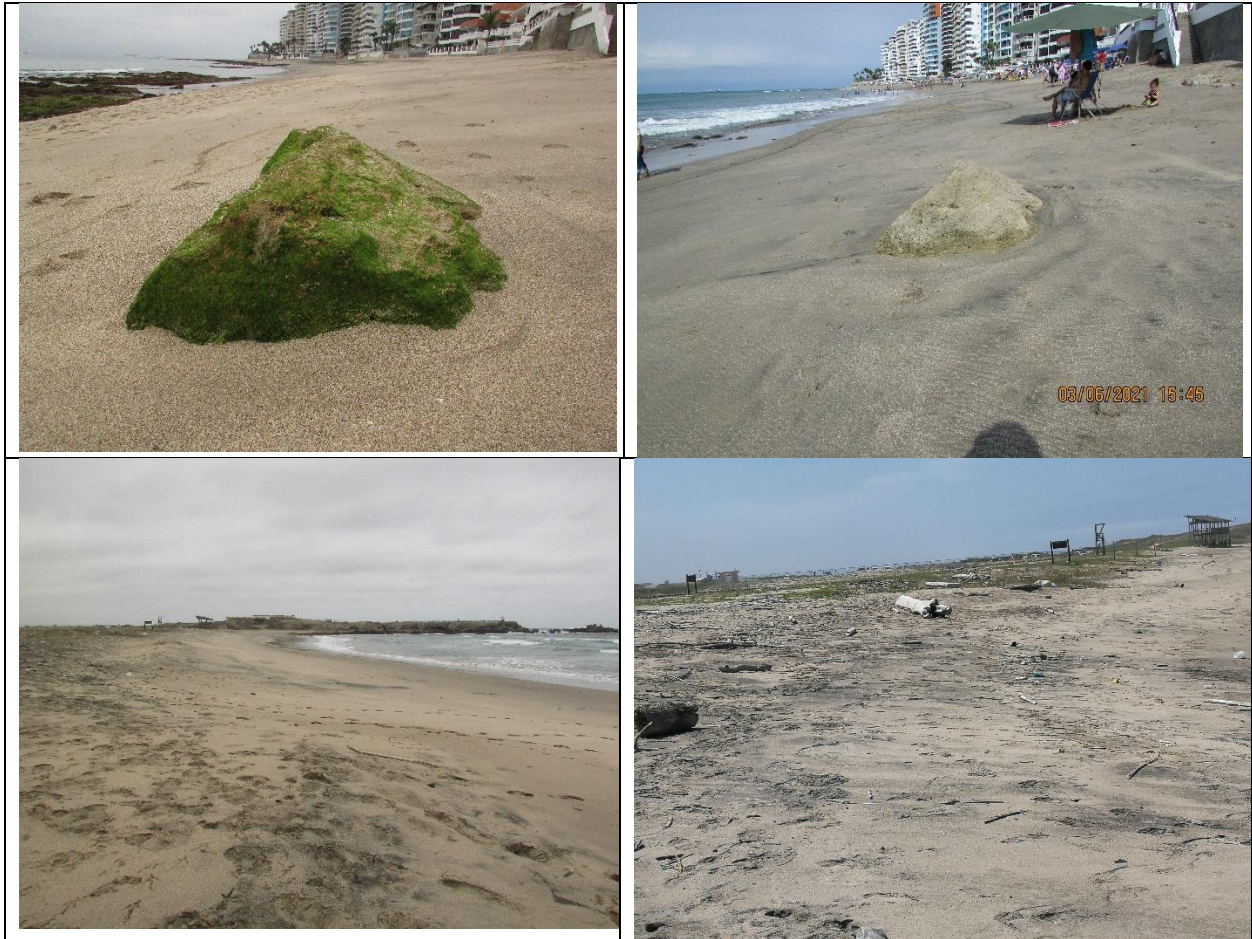

**Photo 2.** Type of plastics found; microplastics (under 5 mm diameter). Station D. Ormaza-González and Vera Mosquera (2021).

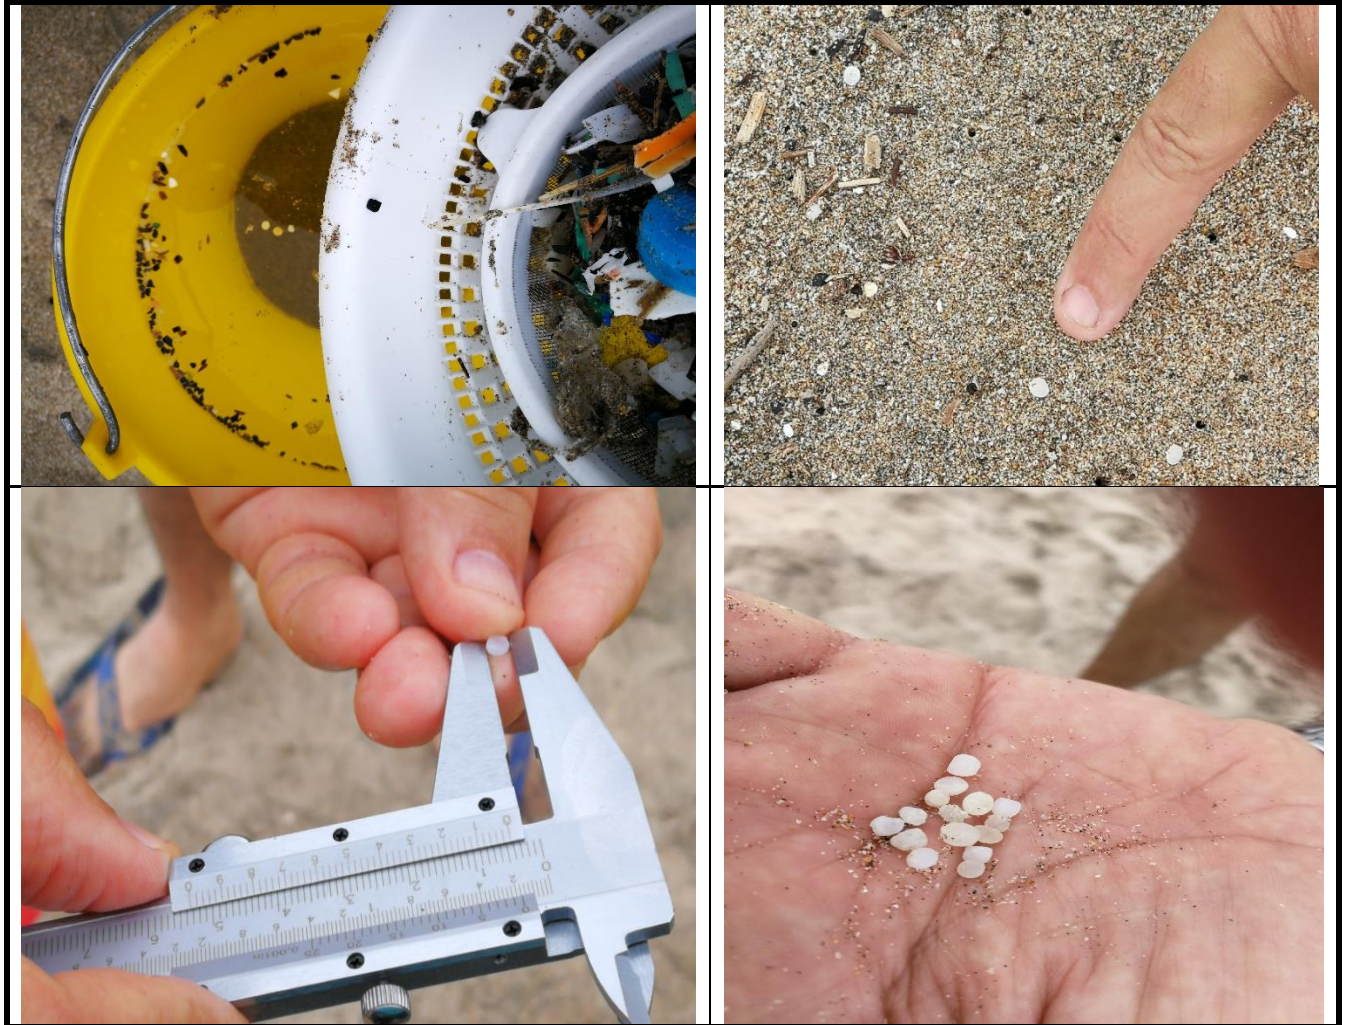



**Photo 3.** Type of plastic found in beaches in Salinas. Station D. Station D. Ormaza-González and Vera Mosquera (2021).

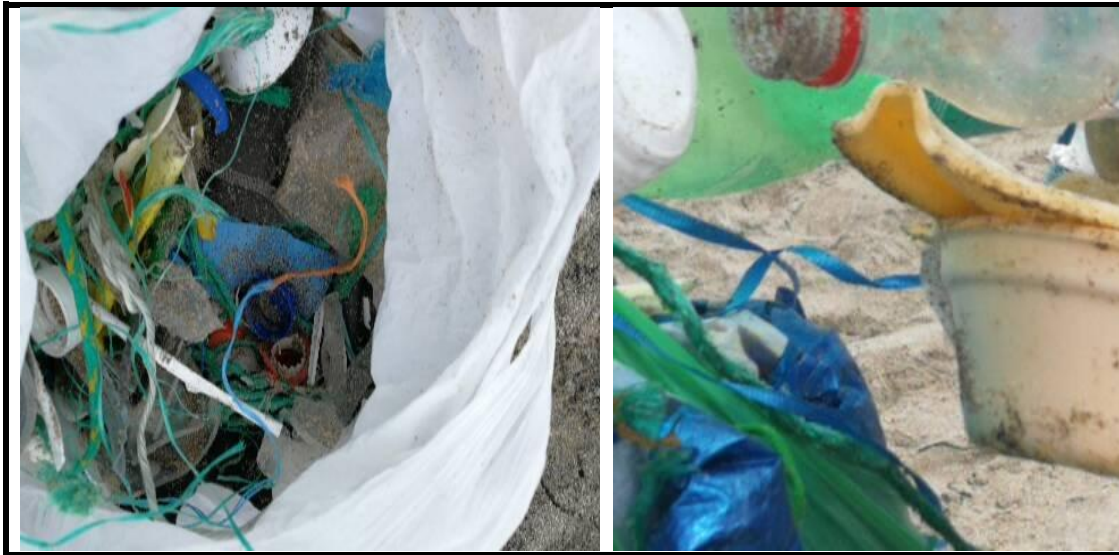

Supplement: Data_Sheet_1.pdf [file Data_Sheet_1.pdf]
